# Supplementary material
Source: PubMed Central journal article supplement (PMC8085853)
Supplement: ajcr0011-1391-f8.pdf [file ajcr0011-1391-f8.pdf]

# Anti-melanoma effect of lycorine hydrochloride

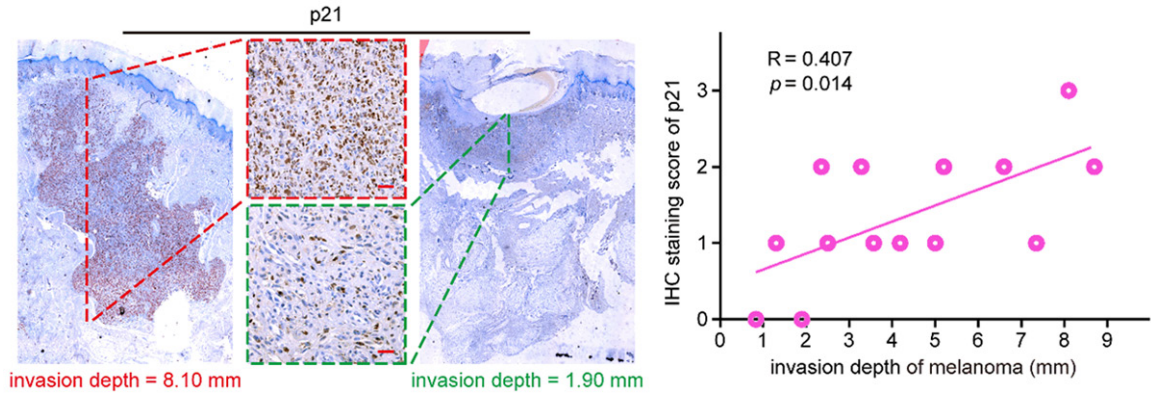

**Figure S1.** Correlation between p21 positive index and invasion depth of cutaneous melanoma. Scale bar, 100 μm.

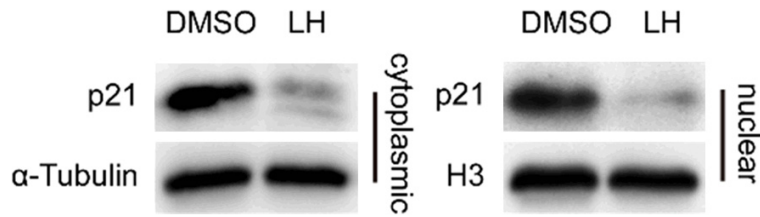

**Figure S2.** After treatment with 20 μM LH for 48 h, the expression of p21 in cytoplasm and nucleus of A375 cells was detected by western blotting analysis.
